# Supplementary material
Source: publisher site journal article supplement (https://www.spandidos-publications.com/7753/downloadSupplementary)
Supplement: Supplementary file 1 [file downloadSupplementary]

**Table SI.** miR target sequences used in the miR array.

| No. | miR             | Sequence, 5'→3'           |
|-----|-----------------|---------------------------|
| 1   | hsa-miR-582-5p  | UUACAGUUGUUCAACCAGUUACU   |
| 2   | hsa-miR-27b-3p  | UUCACAGUGGCUAAGUUCUGC     |
| 3   | hsa-miR-134-5p  | UGUGACUGGUUGACCAGAGGGG    |
| 4   | hsa-miR-21-5p   | UAGCUUAUCAGACUGAUGUUGA    |
| 5   | hsa-miR-192-5p  | CUGACCUAUGAAUUGACAGCC     |
| 6   | hsa-miR-143-3p  | UGAGAUGAAGCACUGUAGCUC     |
| 7   | hsa-miR-203a-5p | AGUGGUUCUUAACAGUUCAACAGUU |
| 8   | hsa-miR-494-3p  | UGAAACAUAACACGGGAAACCUC   |
| 9   | hsa-miR-215-3p  | UCUGUCAUUUCUUUAGGCCAAUA   |
| 10  | hsa-miR-23a-5p  | GGGGUUCCUGGGGAUGGGAUUU    |
| 11  | hsa-miR-10b-5p  | UACCCUGUAGAACCGAAUUUGUG   |
| 12  | hsa-miR-425-5p  | AAUGACACGAUCACUCCCGUUGA   |
| 13  | hsa-miR-587     | UUUCCAUAAGGUGAUGAGUCAC    |
| 14  | hsa-miR-330-3p  | GCAAAGCACACGGCCUGCAGAGA   |
| 15  | hsa-miR-20a-5p  | UAAAGUGCUUAUAGUGCAGGUAG   |
| 16  | hsa-miR-302a-3p | UAAGUGCUUCCAUGUUUUGGUGA   |
| 17  | hsa-miR-122-5p  | UGGAGUGUGACAAUGGUGUUUG    |
| 18  | hsa-miR-34a-5p  | UGGCAGUGUCUAGCUGGUUGU     |
| 19  | hsa-miR-204-5p  | UCCCUUUGUCAUCCU AUGCCU    |
| 20  | hsa-miR-365a-3p | UAAUGCCCCUAAAAUCCUUAU     |
| 21  | hsa-miR-1915-3p | CCCCAGGGCGACGCGGCGGG      |
| 22  | hsa-miR-129-5p  | CUUUUUGCGGUCUGGGCUUGC     |
| 23  | hsa-miR-197-3p  | UUCACCACCUUCUCCACCCAGC    |
| 24  | hsa-miR-3190-5p | UCUGGCCAGCUACGUCCCA       |
| 25  | hsa-miR-105-3p  | ACGGAUGUUUGAGCAUGUGCUA    |
| 26  | hsa-miR-3148    | UGGAAAAAACUGGUGUGUGCUU    |
| 27  | hsa-miR-124-3p  | UAAGGCACGCGGUGAAUGCCAA    |
| 28  | hsa-miR-22-3p   | AAGCUGCCAGUUGAAGAACUGU    |
| 29  | hsa-miR-149-5p  | UCUGGCUCGUGUCUUCACUCC     |
| 30  | hsa-miR-433-3p  | AUCAUGAUGGGCUCUCGGUGU     |
| 31  | hsa-miR-29a-3p  | UAGCACCAUCUGAAAUCGGUUA    |
| 32  | hsa-miR-375-3p  | UUUGUUCGUUCGGCUCGCGUGA    |
| 33  | hsa-miR-218-5p  | UUGUGCUUGAUCUAACCAUGU     |
| 34  | hsa-miR-361-5p  | UUAUCAGAAUCUCCAGGGGUAC    |
| 35  | hsa-miR-192-5p  | CUGACCUAUGAAUUGACAGCC     |
| 36  | hsa-miR-27a-3p  | UUCACAGUGGCUAAGUUCGCG     |
| 37  | hsa-miR-100-5p  | AACCCGUAGAUCCGAACUUGUG    |
| 38  | miR-193a-3p     | AACUGGCCUACAAAGUCCAGU     |
| 39  | hsa-miR-193b-3p | AACUGGCCUCAAAGUCCCGCU     |
| 40  | hsa-miR-519c-3p | AAAGUGCAUCUUUUUAGAGGAU    |
| 41  | hsa-miR-409-3p  | GAAUGUUGCUCGGUGAACCCCU    |
| 42  | hsa-miR-766-3p  | ACUCCAGCCCCACAGCCUCAGC    |
| 43  | hsa-miR-139-5p  | UCUACAGUGCACGUGUCUCCAGU   |

hsa, *Homo sapiens*; miR, microRNA.
